# Supplementary material for: Benzimidazole-based mononuclear polypyridyl Cu( ii ) complexes: DNA binding, cleavage, and in vitro antiproliferative studies
Source: Royal Society of Chemistry journal article supplement (doi:10.1039/d4dt03379e), 2025-01-01
Supplement: d4dt03379e1.pdf [file d4dt03379e1.pdf]

## **Supporting Information**

### **Benzimidazole-based mononuclear polypyridyl Cu(II) complexes towards DNA binding, cleavage, and *in vitro* antiproliferative studies**

Indrajit Roy<sup>a</sup>, Shobhit Mathur<sup>a</sup>, Sourav Deb<sup>a</sup>, Sharan Shanmuga Vuppaladadium Rathnam<sup>b</sup>, Nikhil Tuti<sup>b</sup>, Unnikrishnan Paruthiyezhath Shaji<sup>b</sup>, Karthikeyan L<sup>a</sup>, Anindya Roy<sup>b</sup> and Somnath Maji<sup>a\*</sup>

<sup>a</sup>Department of Chemistry, Indian Institute of Technology Hyderabad, Kandi, Sangareddy 502284, Telangana, India

<sup>b</sup>Department of Biotechnology, Indian Institute of Technology, Hyderabad, Kandi, Sangareddy 502284 Telangana, India

\*Corresponding author

Email address: [smaji@chy.iith.ac.in](mailto:smaji@chy.iith.ac.in) (Somnath Maji).

**Table S1** Selected crystallographic data for **1**, **2** and **3**

| <b>Complex</b>                                | <b>1</b>                                                                                        | <b>2</b>                                                                        | <b>3</b>                                                                        |
|-----------------------------------------------|-------------------------------------------------------------------------------------------------|---------------------------------------------------------------------------------|---------------------------------------------------------------------------------|
| Empirical formula                             | C <sub>65</sub> H <sub>61</sub> Cl <sub>4</sub> Cu <sub>2</sub> N <sub>15</sub> O <sub>19</sub> | C <sub>35</sub> H <sub>28</sub> Cl <sub>2</sub> CuN <sub>8</sub> O <sub>8</sub> | C <sub>35</sub> H <sub>29</sub> Cl <sub>2</sub> CuN <sub>7</sub> O <sub>8</sub> |
| Formula weight                                | 1611.14                                                                                         | 823.09                                                                          | 810.09                                                                          |
| Temperature/K                                 | 298.00                                                                                          | 298.00                                                                          | 298.00                                                                          |
| Crystal system                                | triclinic                                                                                       | triclinic                                                                       | monoclinic                                                                      |
| Space group                                   | <i>P</i> -1                                                                                     | <i>P</i> -1                                                                     | <i>P</i> 2 <sub>1</sub> / <i>c</i>                                              |
| <i>a</i> /Å                                   | 8.9566(9)                                                                                       | 9.1527(7)                                                                       | 13.4155(9)                                                                      |
| <i>b</i> /Å                                   | 13.6649(12)                                                                                     | 14.2703(11)                                                                     | 15.0657(10)                                                                     |
| <i>c</i> /Å                                   | 29.392(3)                                                                                       | 14.6239(11)                                                                     | 18.0834(10)                                                                     |
| <i>α</i> /°                                   | 80.736(3)                                                                                       | 90.791(3)                                                                       | 90                                                                              |
| <i>β</i> /°                                   | 84.755(3)                                                                                       | 99.831(3)                                                                       | 102.119(2)                                                                      |
| <i>γ</i> /°                                   | 82.120(3)                                                                                       | 108.495(2)                                                                      | 90                                                                              |
| Volume/Å <sup>3</sup>                         | 3508.0(6)                                                                                       | 1780.1(2)                                                                       | 3573.5(4)                                                                       |
| <i>Z</i>                                      | 2                                                                                               | 2                                                                               | 4                                                                               |
| ρ <sub>calc</sub> /cm <sup>3</sup>            | 1.525                                                                                           | 1.536                                                                           | 1.506                                                                           |
| μ/mm <sup>-1</sup>                            | 0.841                                                                                           | 0.828                                                                           | 0.823                                                                           |
| F(000)                                        | 1652.0                                                                                          | 842.0                                                                           | 1660.0                                                                          |
| Crystal size/mm <sup>3</sup>                  | 0.06 × 0.06 × 0.04                                                                              | 0.08 × 0.08 × 0.06                                                              | 0.06 × 0.06 × 0.04                                                              |
| Radiation                                     | MoKα (λ = 0.71073)                                                                              | MoKα (λ = 0.71073)                                                              | MoKα (λ = 0.71073)                                                              |
| 2θ range for data collection/°                | 3.54 to 54.206                                                                                  | 3.986 to 54.206                                                                 | 3.552 to 54.43                                                                  |
| Index ranges                                  | -11 ≤ <i>h</i> ≤ 11, -16 ≤ <i>k</i> ≤ 17, -37 ≤ <i>l</i> ≤ 37                                   | -11 ≤ <i>h</i> ≤ 11, -18 ≤ <i>k</i> ≤ 18, -18 ≤ <i>l</i> ≤ 18                   | -17 ≤ <i>h</i> ≤ 17, -19 ≤ <i>k</i> ≤ 22, -23 ≤ <i>l</i> ≤ 22                   |
| Reflections collected                         | 110906                                                                                          | 47026                                                                           | 57556                                                                           |
| Independent reflections                       | 15497 [R <sub>int</sub> = 0.1390, R <sub>sigma</sub> = 0.0947]                                  | 7817 [R <sub>int</sub> = 0.0607, R <sub>sigma</sub> = 0.0442]                   | 7922 [R <sub>int</sub> = 0.0883, R <sub>sigma</sub> = 0.0588]                   |
| Data/restraints/parameters                    | 15497/0/887                                                                                     | 7817/0/462                                                                      | 7922/0/482                                                                      |
| Goodness-of-fit on <i>F</i> <sup>2</sup>      | 1.032                                                                                           | 1.032                                                                           | 1.041                                                                           |
| Final R indexes [ <i>I</i> ≥ 2σ ( <i>I</i> )] | R <sub>1</sub> = 0.0643, wR <sub>2</sub> = 0.1565                                               | R <sub>1</sub> = 0.0631, wR <sub>2</sub> = 0.1782                               | R <sub>1</sub> = 0.0733, wR <sub>2</sub> = 0.2067                               |
| Final R indexes [all data]                    | R <sub>1</sub> = 0.1304, wR <sub>2</sub> = 0.1845                                               | R <sub>1</sub> = 0.0827, wR <sub>2</sub> = 0.1962                               | R <sub>1</sub> = 0.1260, wR <sub>2</sub> = 0.2440                               |

Largest diff. peak/hole / e  
 $\text{\AA}^{-3}$                       0.71/−0.50                      1.57/−1.32                      2.09/−0.73

**Table S2** Selected bond lengths ( $\text{\AA}$ ) and bond angles ( $^\circ$ ) for **1**, **2** and **3**

| <b>Complex</b> | <b>1</b>   | <b>2</b>   | <b>3</b>   |
|----------------|------------|------------|------------|
| Cu1–N1         | 1.964(3)   | 1.958(3)   | 1.964(4)   |
| Cu1–N2         | 1.998(3)   | 2.006(3)   | 2.029(4)   |
| Cu1–N3         | 2.014(3)   | 2.023(3)   | 2.020(4)   |
| Cu1–N4         | 1.995(3)   | 1.991(3)   | 1.993(4)   |
| Cu1–N5         | 2.192(3)   | 2.217(3)   | 2.202(4)   |
| Cu2–N8         | 1.979(3)   | -          | -          |
| Cu2–N9         | 2.031(3)   | -          | -          |
| Cu2–N10        | 2.013(3)   | -          | -          |
| Cu2–N11        | 2.210(4)   | -          | -          |
| Cu2–N12        | 2.007(3)   | -          | -          |
| N1–Cu1–N2      | 79.77(14)  | 80.07(12)  | 79.26(17)  |
| N1–Cu1–N3      | 79.80(14)  | 79.57(12)  | 80.08(17)  |
| N1–Cu1–N4      | 170.91(14) | 174.03(11) | 166.68(18) |
| N1–Cu1–N5      | 110.76(14) | 106.82(12) | 112.67(18) |
| N2–Cu1–N4      | 99.44(14)  | 99.06(12)  | 100.08(17) |
| N3–Cu1–N2      | 157.74(14) | 157.68(12) | 157.94(18) |
| N3–Cu1–N4      | 99.34(14)  | 100.24(12) | 98.24(17)  |
| N5–Cu1–N2      | 96.48(13)  | 99.67(12)  | 99.65(17)  |
| N5–Cu1–N3      | 98.93(14)  | 94.88(12)  | 95.35(17)  |
| N5–Cu1–N4      | 78.33(13)  | 79.15(11)  | 80.61(19)  |
| N8–Cu2–N9      | 79.31(14)  | -          | -          |
| N8–Cu2–N10     | 79.12(13)  | -          | -          |
| N8–Cu2–N11     | 99.81(15)  | -          | -          |
| N8–Cu2–N12     | 176.88(14) | -          | -          |
| N9–Cu2–N11     | 96.93(14)  | -          | -          |
| N10–Cu2–N9     | 156.56(14) | -          | -          |

|             |            |   |   |
|-------------|------------|---|---|
| N10–Cu2–N11 | 95.67(14)  | - | - |
| N12–Cu2–N9  | 98.64(13)  | - | - |
| N12–Cu2–N10 | 103.27(13) | - | - |
| N12–Cu2–N11 | 78.04(14)  | - | - |

---

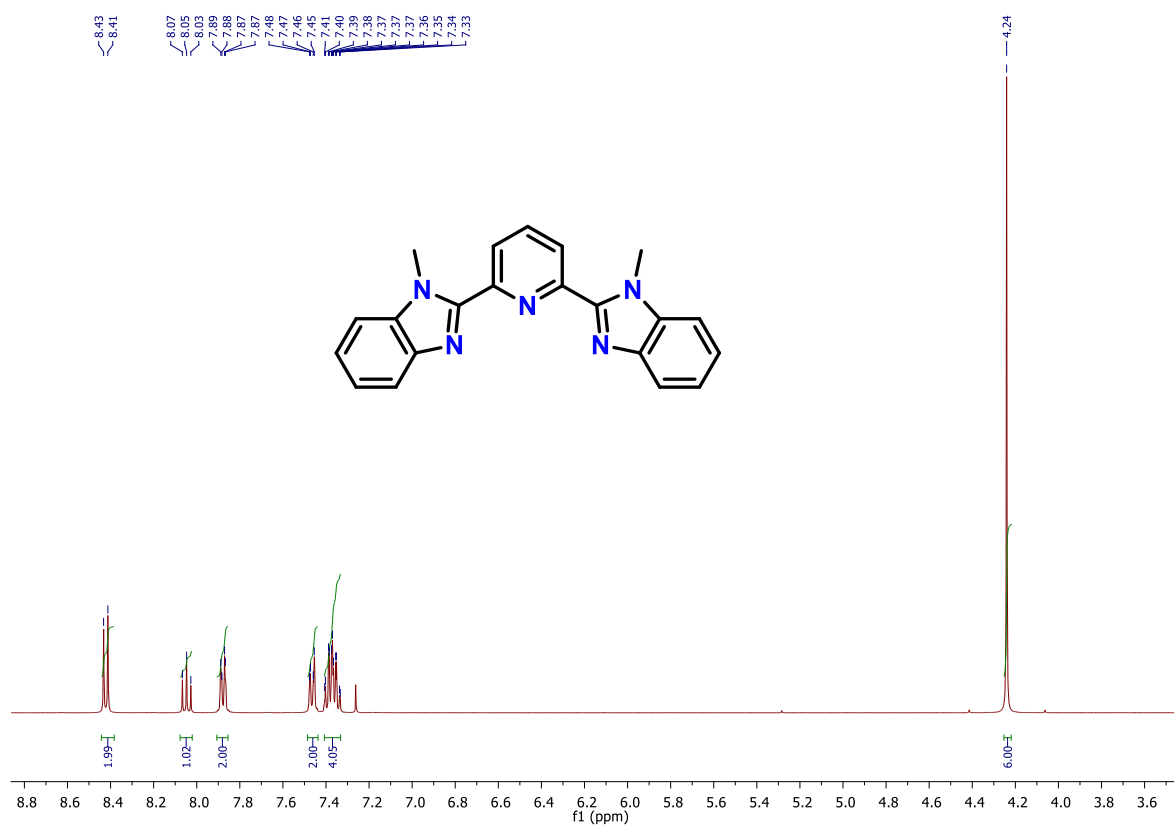

**Fig. S1** <sup>1</sup>H NMR of ligand (L) in CDCl<sub>3</sub> at room temperature.

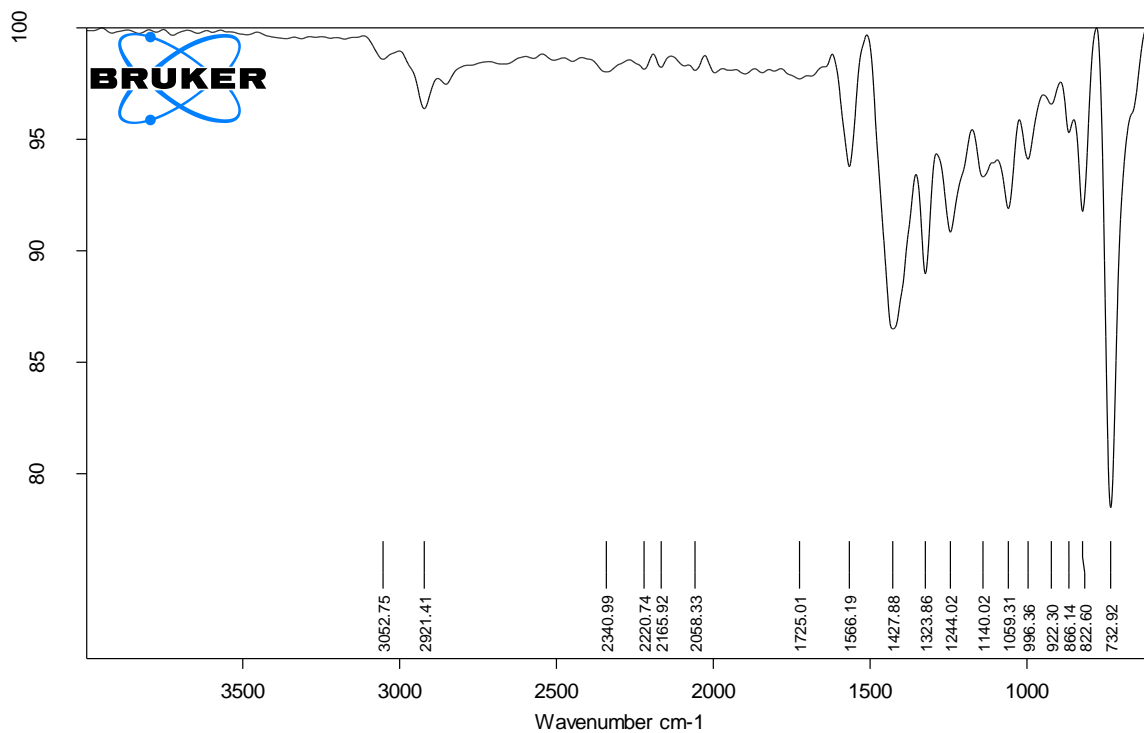

Fig. S2 FT-IR (solid) of L

a)

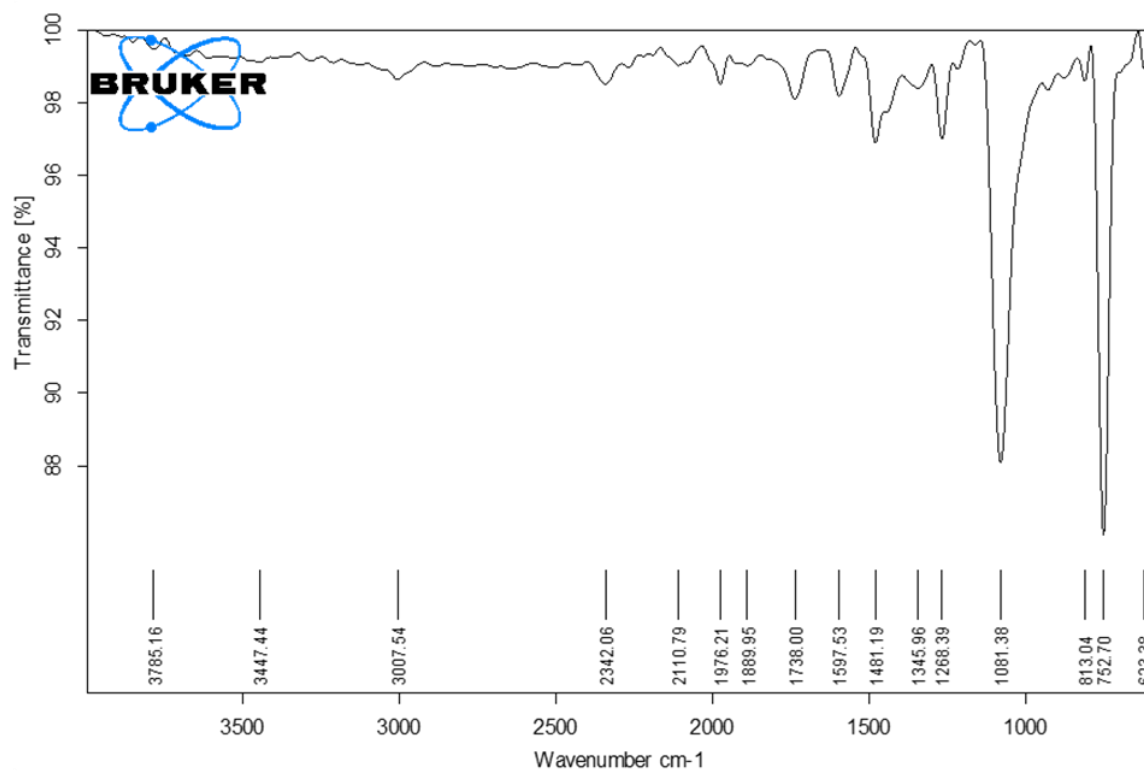

b)

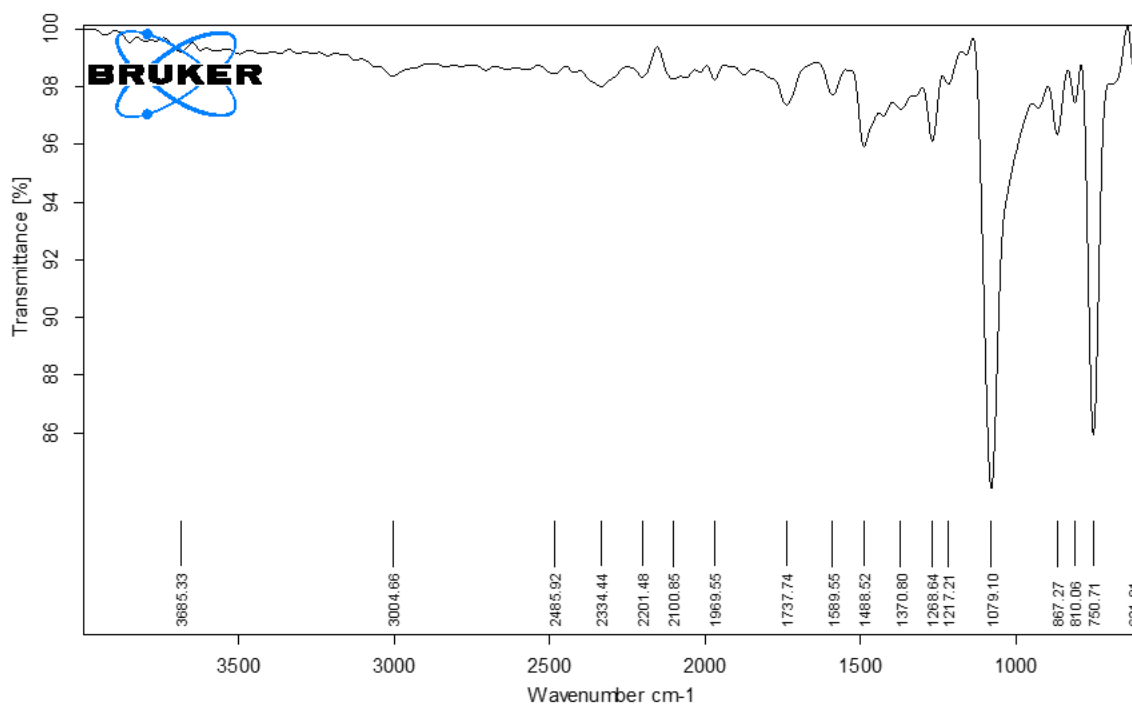

c)

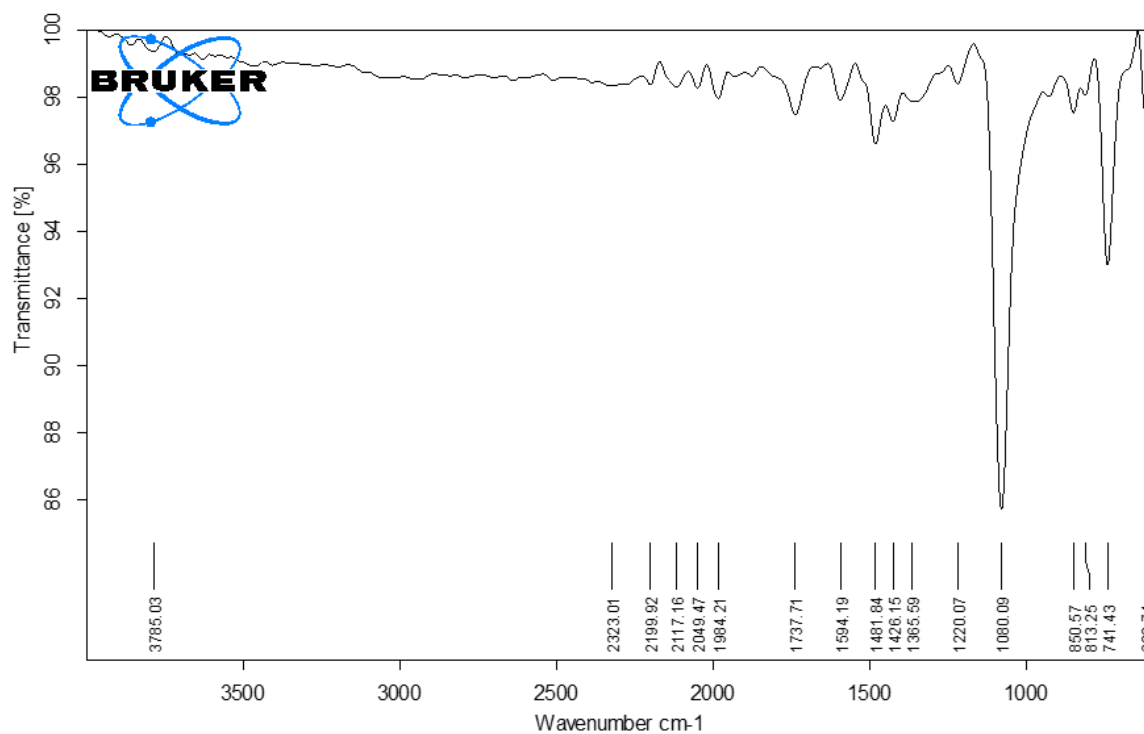

Fig. S3 FT-IR (solid) spectra of a) 1, b) 2, and c) 3.

a)

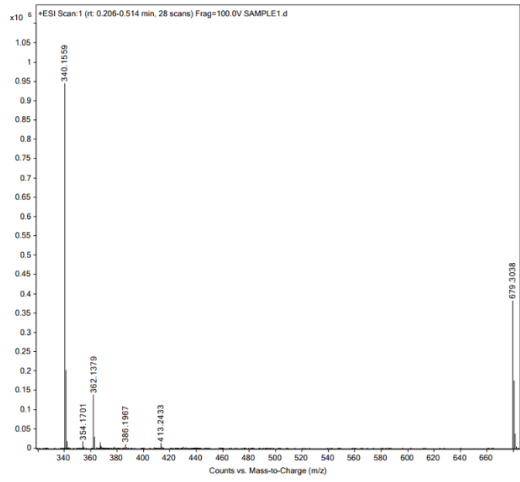

b)

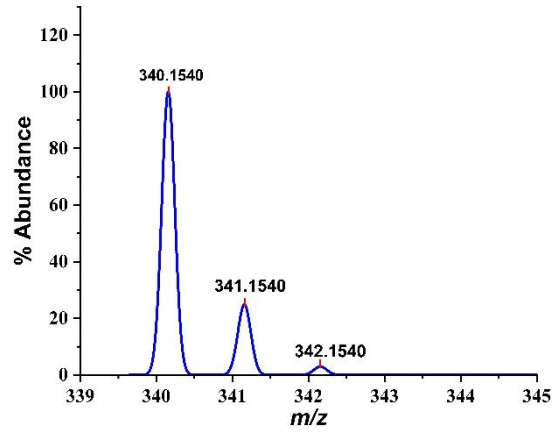

c)

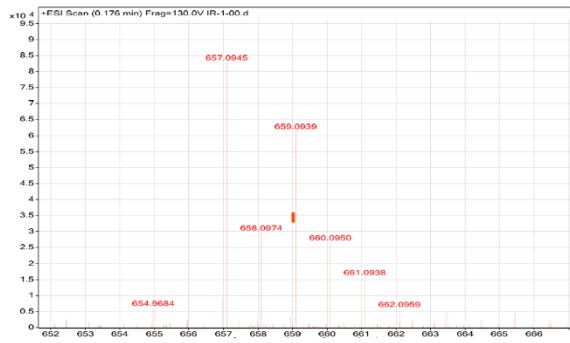

d)

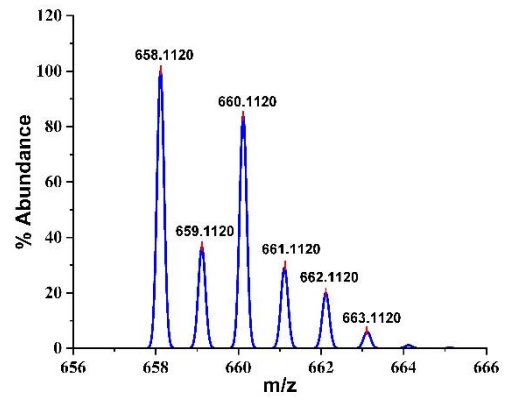

e)

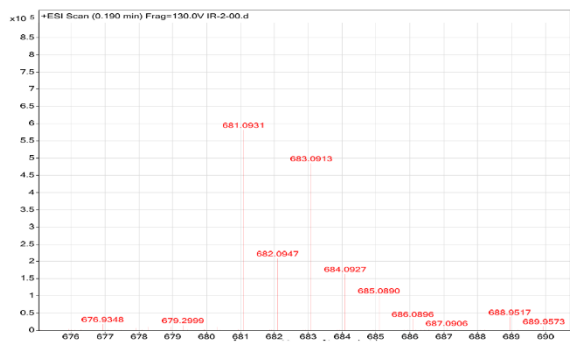

f)

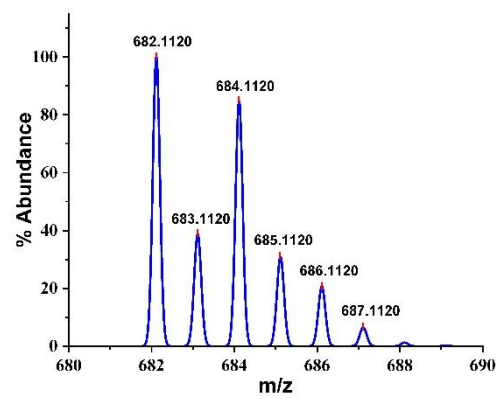

g)

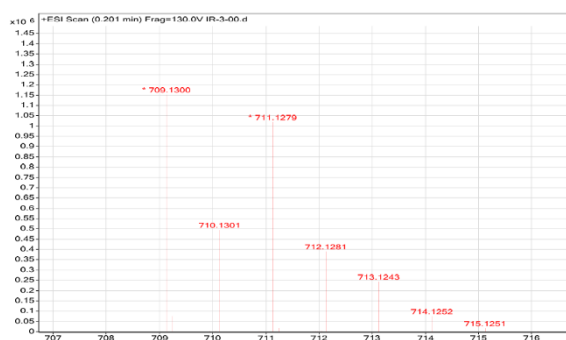

h)

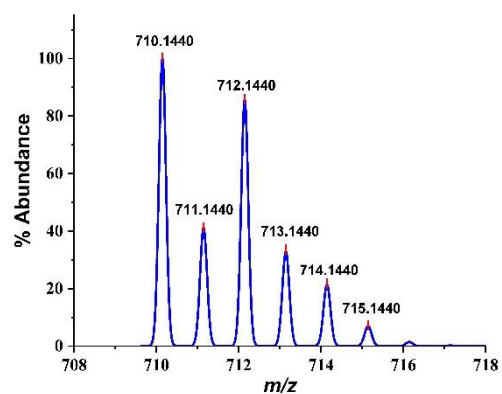

**Fig. S4** HRMS spectra of the **L** a) experimental, b) simulated, **1** c) experimental, d) simulated, **2** e) experimental, f) simulated, and **3** g) experimental, h) simulated.

a)

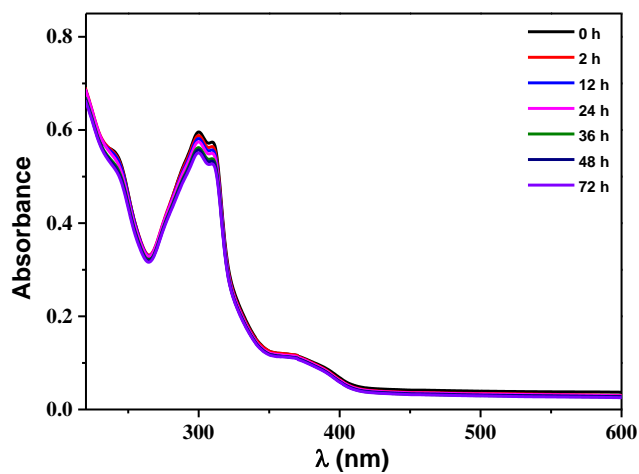

b)

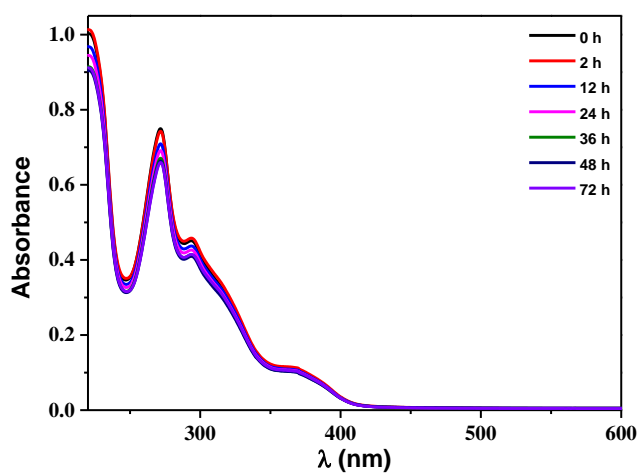



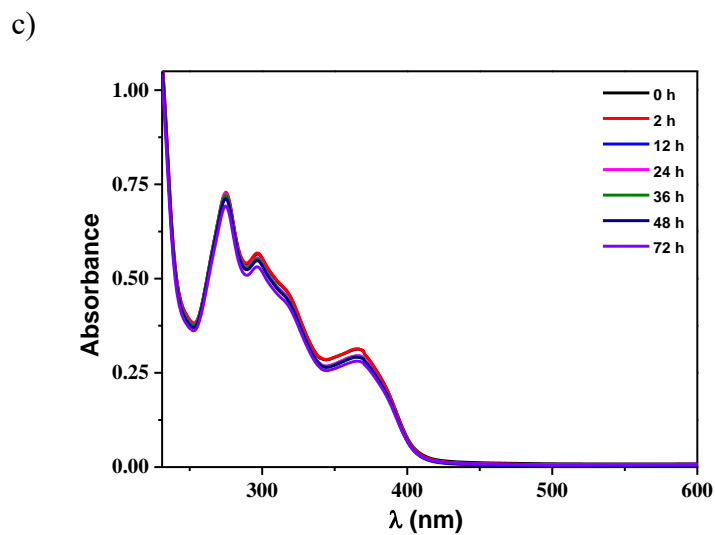

**Fig. S5** Stability of (a) **1**, b) **2**, and (c) **3** in Tris-HCl buffer solution (pH 7.4) for three days.

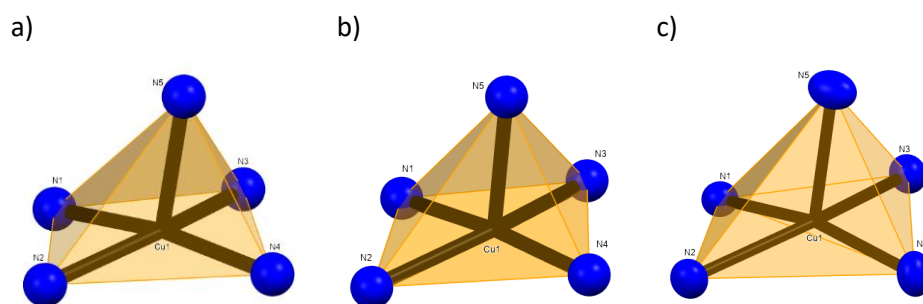

**Fig. S6** Polyhedral view of a) **1**, b) **2** and c) **3**.

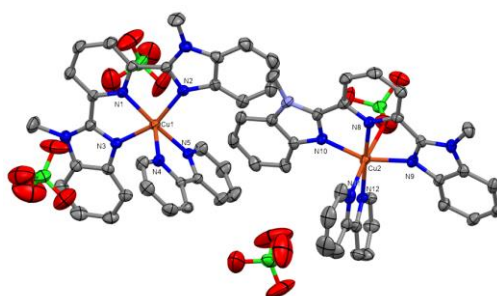

**Fig. S7** The two non-equivalent Cu(II) units present in the crystal symmetry of **1**.

a)

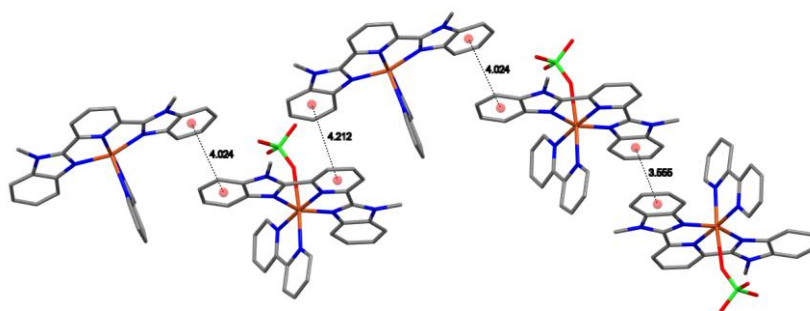

b)

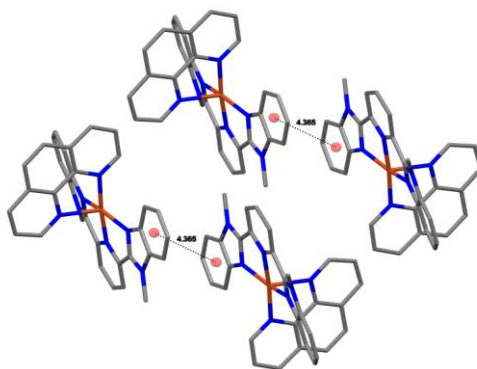

c)

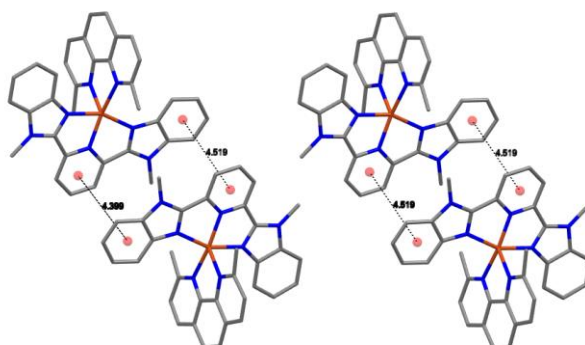

**Fig. S8** Displaced  $\pi$ - $\pi$  stacking interaction present in the crystal structures of a) **1**, b) **2** and c) **3**.

a)

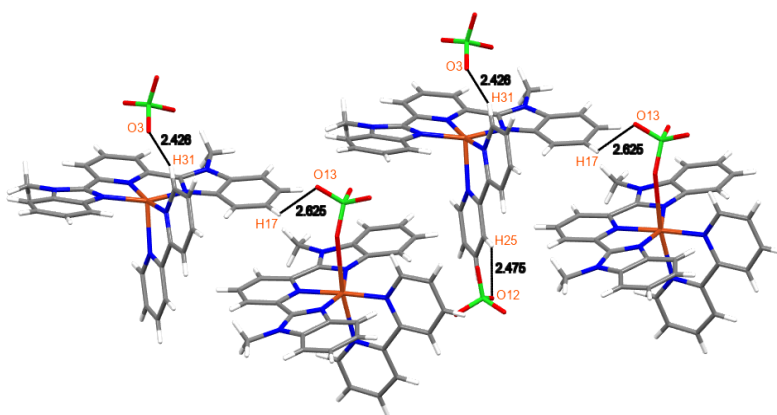

b)

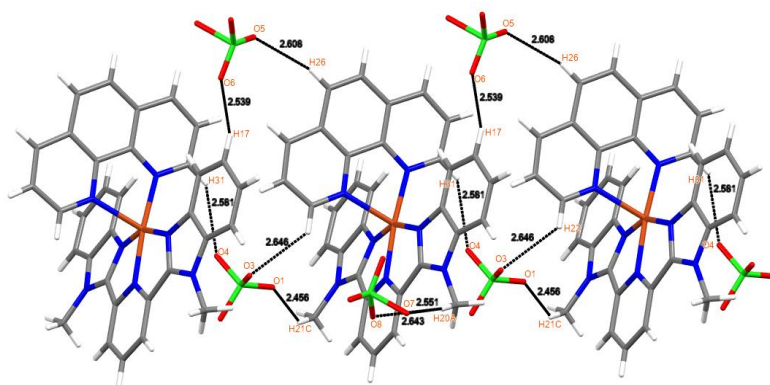

c)

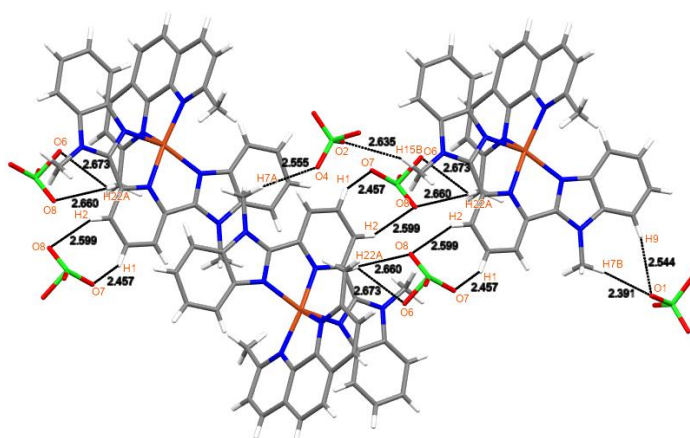

**Fig. S9** Intermolecular H-bonding interactions present in the crystal symmetry of a) 1, b) 2 and c) 3.

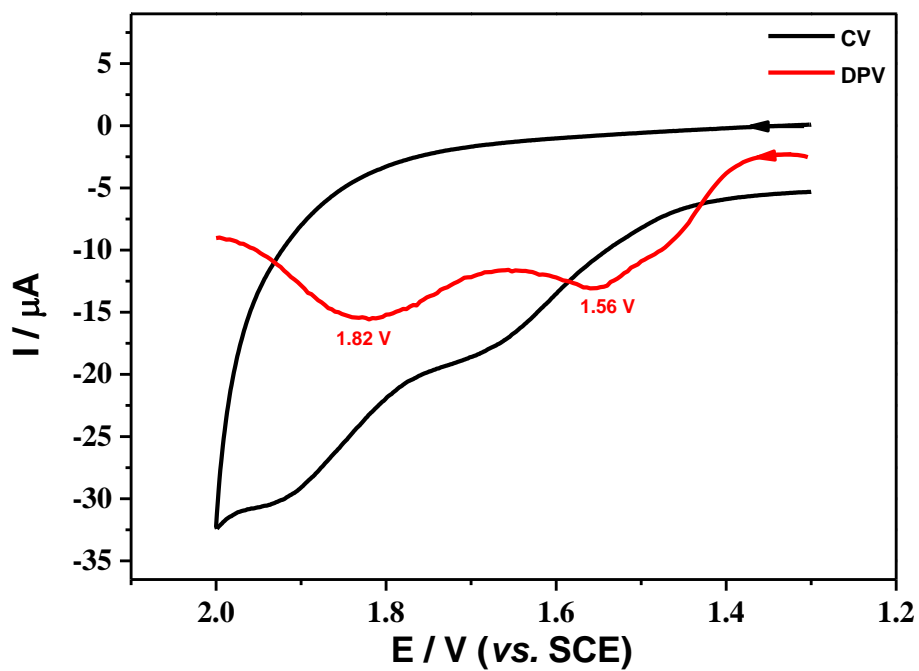

**Fig. S10** CV (black line) and DPV (red line) of ligand **L** in dry acetonitrile solvent using 0.1 M TBAP as supporting electrolyte under nitrogen atmosphere at a scan rate of  $100 \text{ mV s}^{-1}$ .

a)

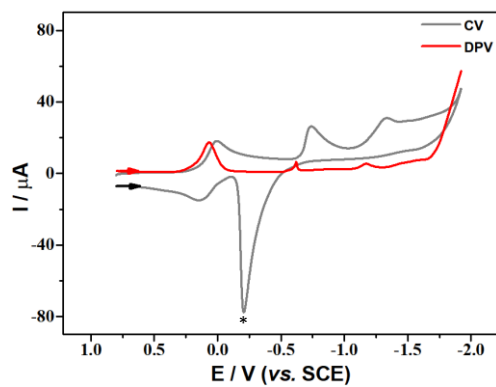

b)

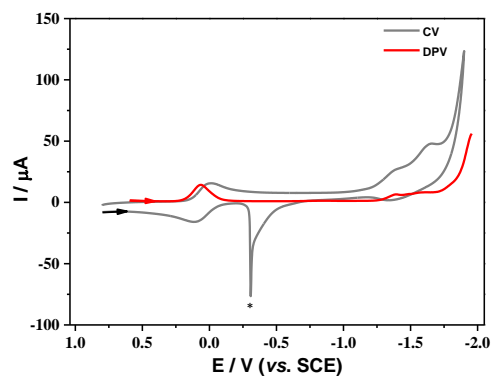

c)

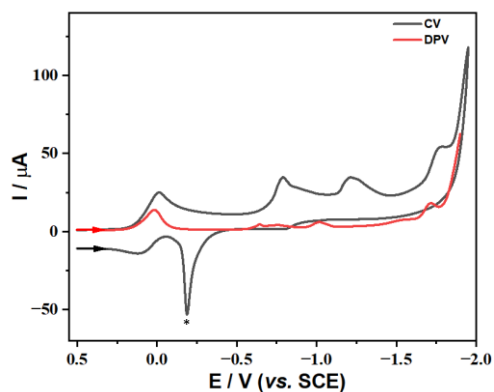

**Fig. S11** CV (black line) and DPV (red line) of a) **1**, b) **2**, and b) **3** in dry acetonitrile solvent using 0.1 M TBAP as supporting electrolyte under nitrogen atmosphere. The \* peak indicates the copper deposition on the electrode surface, for  $\text{Cu}^0 \rightarrow \text{Cu}^{\text{I}}$  oxidation.
